# Supplementary material for: Xylose donor transport is critical for fungal virulence
Source: PubMed Central journal article supplement (PMC5773217; doi:10.1371/journal.ppat.1006765), 2018-01-18
Supplement: ppat.1006765.s001.pdf [file ppat.1006765.s001.pdf]

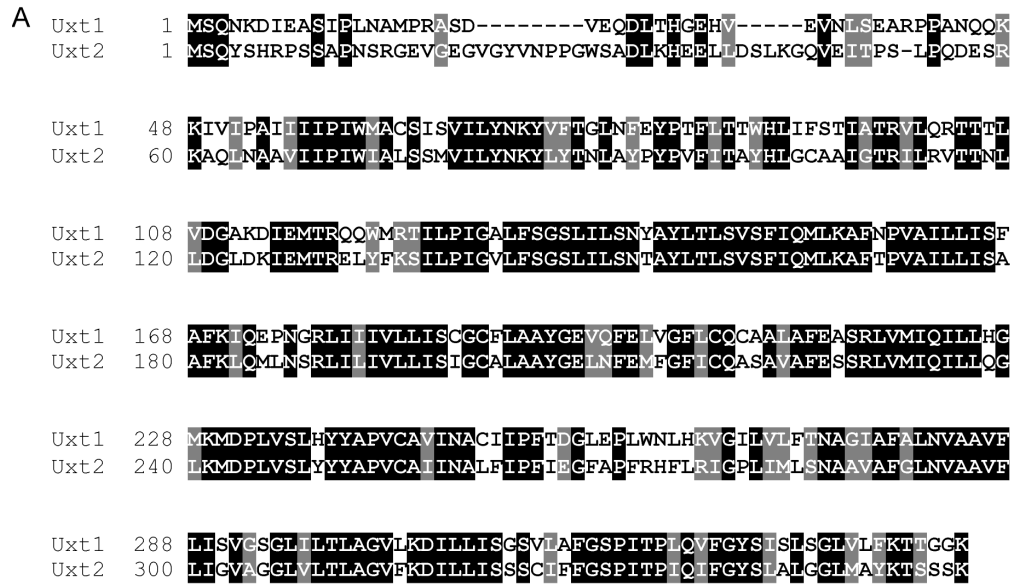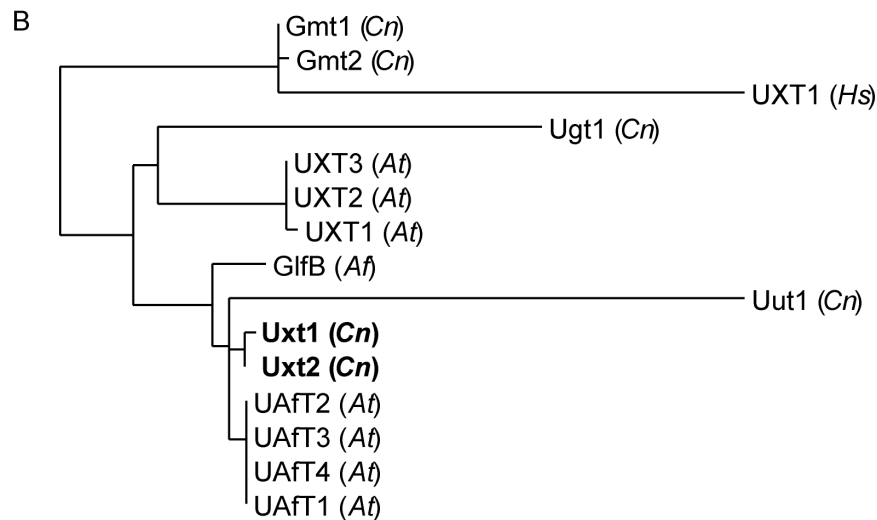

**S1 Figure. Conservation of cryptococcal nucleotide sugar transporters.**

(A) Protein sequence alignment of Uxt1 and Uxt2 (CNAG\_02036 and CNAG\_03695) with conserved residues highlighted (black, identical residues; grey, conserved substitutions). (B) Phylogenetic relationships of *C. neoformans* (Cn) NSTs (including Uxt1 and Uxt2, in bold), and UDP-Xyl, UDP-Galf, and UDP-Arap transporters from other organisms (*Hs*, *Homo sapiens*; *Af*, *Aspergillus fumigatus*; *At*, *Arabidopsis thaliana*) using MUSCLE, PhyML, and TreeDyn software (see Materials and Methods). Branch lengths are drawn to scale.
