# Supplementary material for: Xylose donor transport is critical for fungal virulence
Source: PubMed Central journal article supplement (PMC5773217; doi:10.1371/journal.ppat.1006765), 2018-01-18
Supplement: ppat.1006765.s002.pdf [file ppat.1006765.s002.pdf]

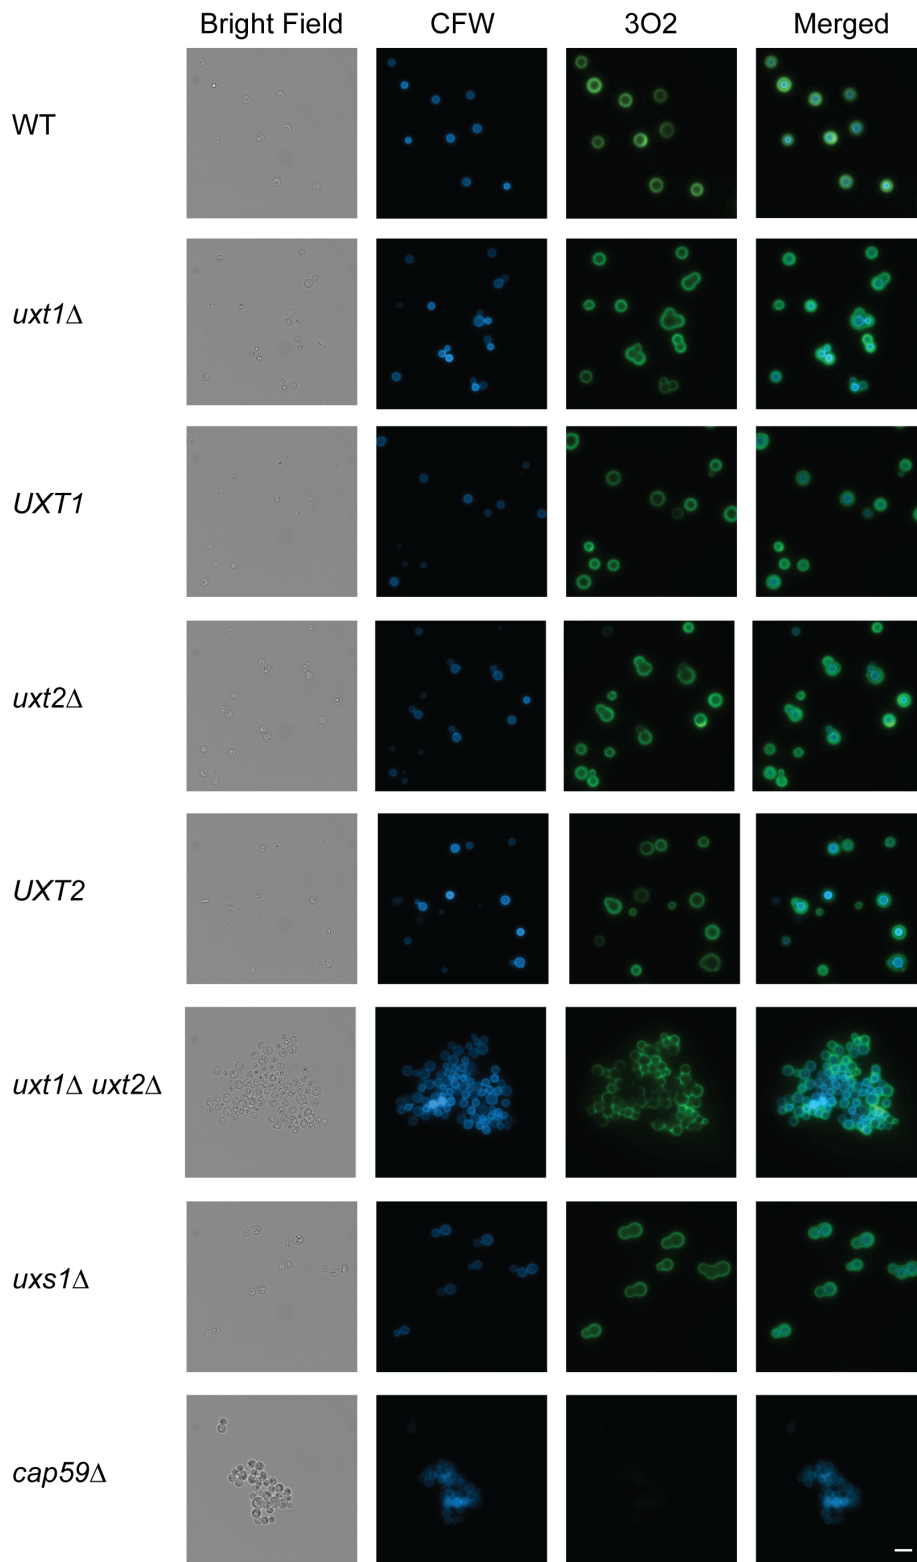

**S2 Figure. *uxt1*Δ *uxt2*Δ is recognized by Xyl-independent capsule antibodies.**

Cells from the indicated strains were incubated with calcofluor white (CFW; blue) to stain the cell wall and anti-GXM mAb 302 to visualize the capsule (green). Bright field, single channel, and merged images are shown; scale bar = 10  $\mu\text{m}$ . *cap59* $\Delta$  is an acapsular strain included as a control.
