# Supplementary material for: Xylose donor transport is critical for fungal virulence
Source: PubMed Central journal article supplement (PMC5773217; doi:10.1371/journal.ppat.1006765), 2018-01-18
Supplement: ppat.1006765.s004.pdf [file ppat.1006765.s004.pdf]

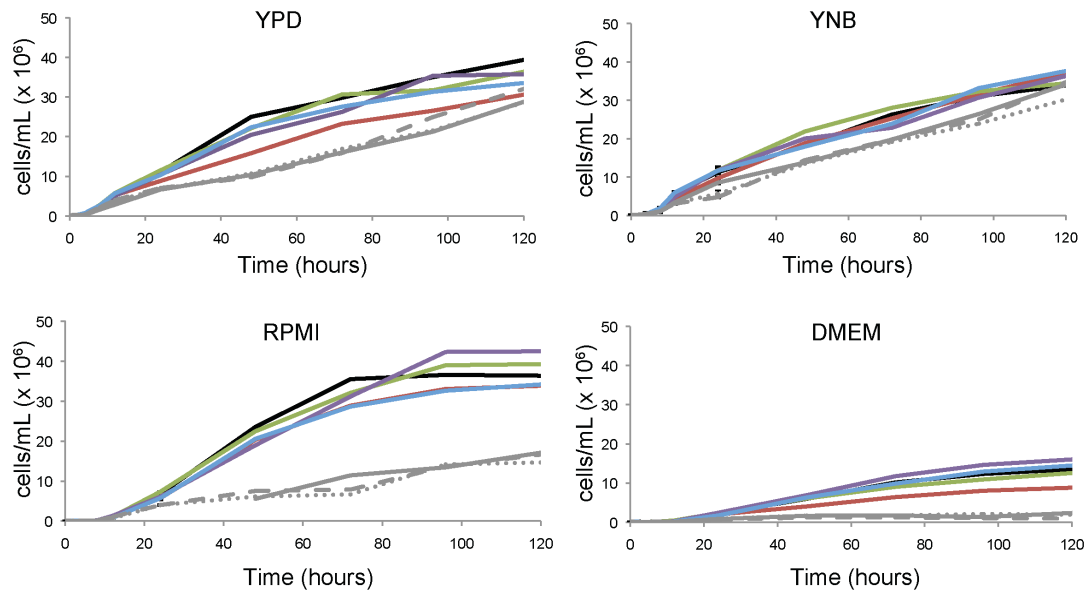

**S4 Figure. *uxt1Δ uxt2Δ* growth is restricted at 37 °C.**

The indicated *C. neoformans* strains were grown overnight at 30 °C in YPD, diluted to 10<sup>5</sup> cells/mL in the media indicated, and incubated at 37 °C with 5% CO<sub>2</sub>. The results shown are the averages of three measurements. Black, WT; red, *uxt1Δ*; green, *UXT1*; purple, *uxt2Δ*; blue, *UXT2*; grey, *uxt1Δ uxt2Δ* (continuous and dashed lines, representing three independently obtained double deletion strains).
