# Supplementary material for: Xylose donor transport is critical for fungal virulence
Source: PubMed Central journal article supplement (PMC5773217; doi:10.1371/journal.ppat.1006765), 2018-01-18
Supplement: ppat.1006765.s005.pdf [file ppat.1006765.s005.pdf]

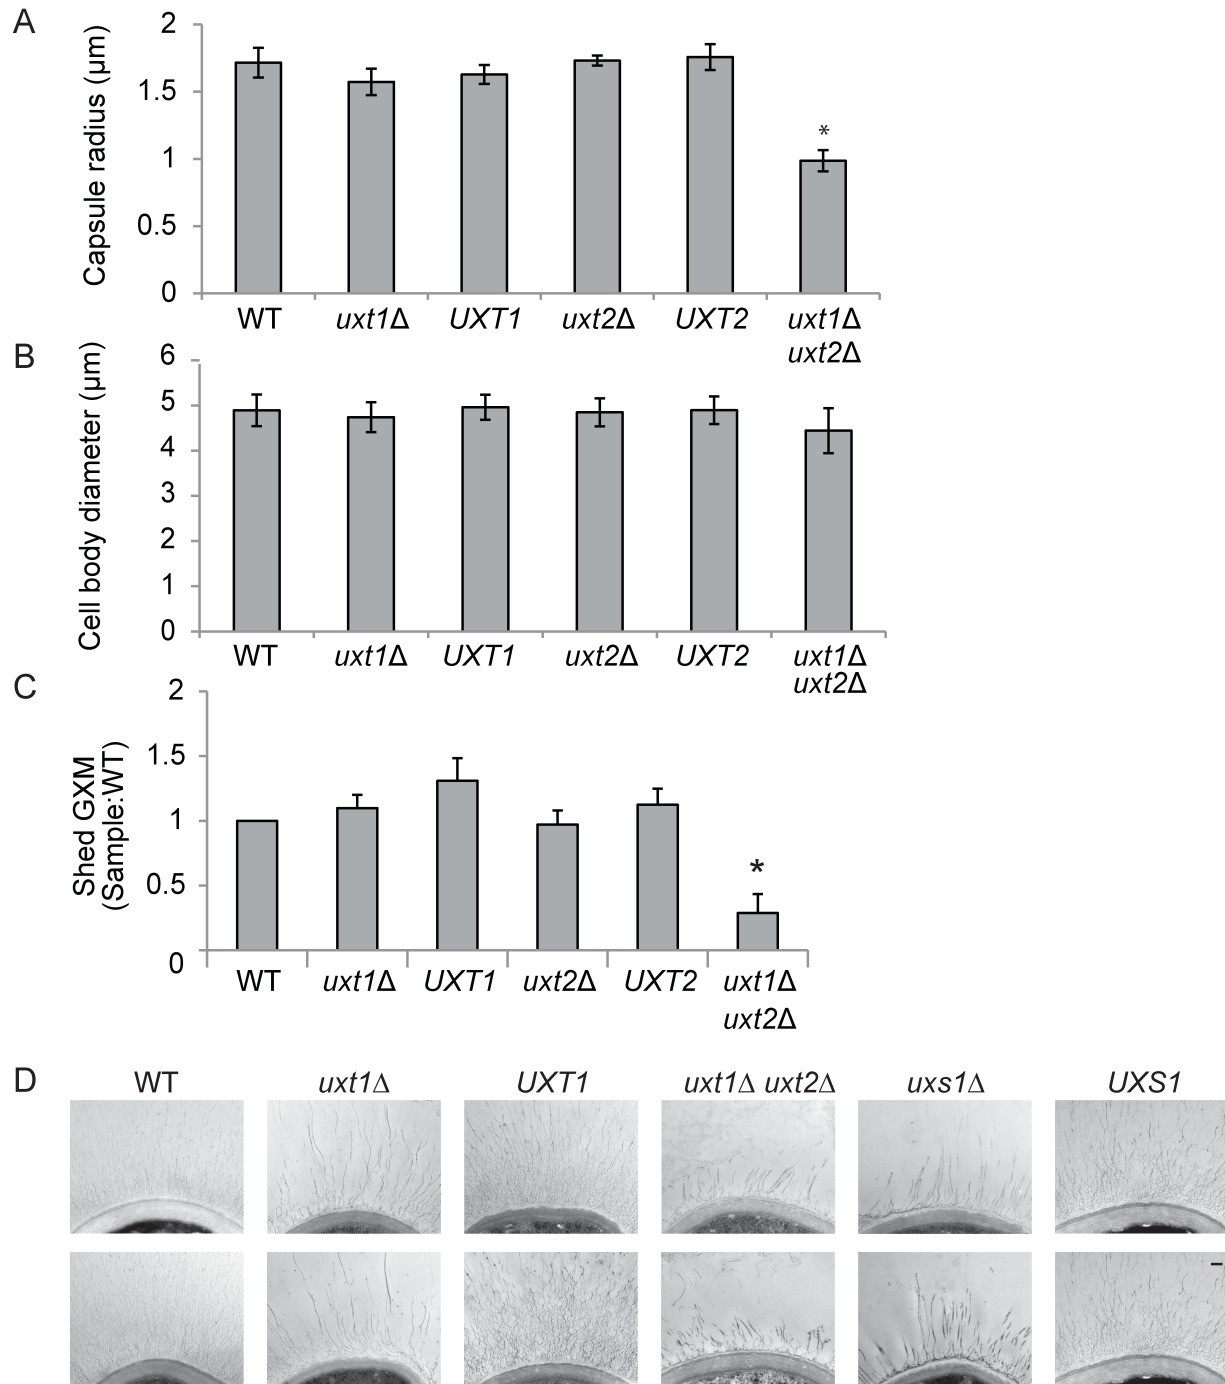

**S5 Figure. Morphological defects of *uxt1Δ uxt2Δ*.**

Induced cells were stained with India Ink, and the radius of the capsule (A) and diameter of the cell body (B) were measured using ImageJ (100 cells counted per strain; mean  $\pm$  SEM of three biological replicates). (C) GXM shed from equal numbers

of each of the indicated strains was quantitated by ELISA (see Materials and Methods). Data is the mean  $\pm$  SEM of three independent experiments. \*,  $p < 0.05$ , one-way ANOVA with Tukey's *post-hoc* test. (D) Electron micrographs of the indicated strains induced for capsule as in Fig. 5. Two representative images are displayed for each strain. Scale bar = 0.5  $\mu\text{m}$ .
