# Supplementary material for: Xylose donor transport is critical for fungal virulence
Source: PubMed Central journal article supplement (PMC5773217; doi:10.1371/journal.ppat.1006765), 2018-01-18
Supplement: ppat.1006765.s006.pdf [file ppat.1006765.s006.pdf]

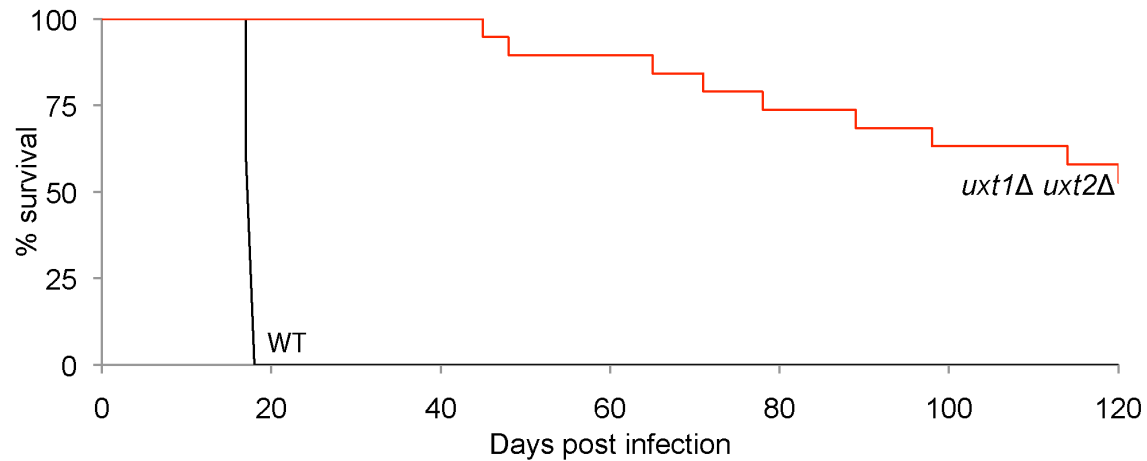

**S6 Figure. *uxt1Δ uxt2Δ* is severely attenuated for virulence in C57BL/6 mice.**

Survival of C57BL/6 mice after intranasal inoculation with  $5 \times 10^4$  cells of WT (n = 5) or *uxt1Δ uxt2Δ* (n = 19). C57BL/6 mice naturally skew towards a non-protective Th2-type response, which increases their susceptibility to cryptococcal infection compared to A/JCr mice [57].
