# Supplementary material for: Xylose donor transport is critical for fungal virulence
Source: PubMed Central journal article supplement (PMC5773217; doi:10.1371/journal.ppat.1006765), 2018-01-18
Supplement: ppat.1006765.s007.pdf [file ppat.1006765.s007.pdf]

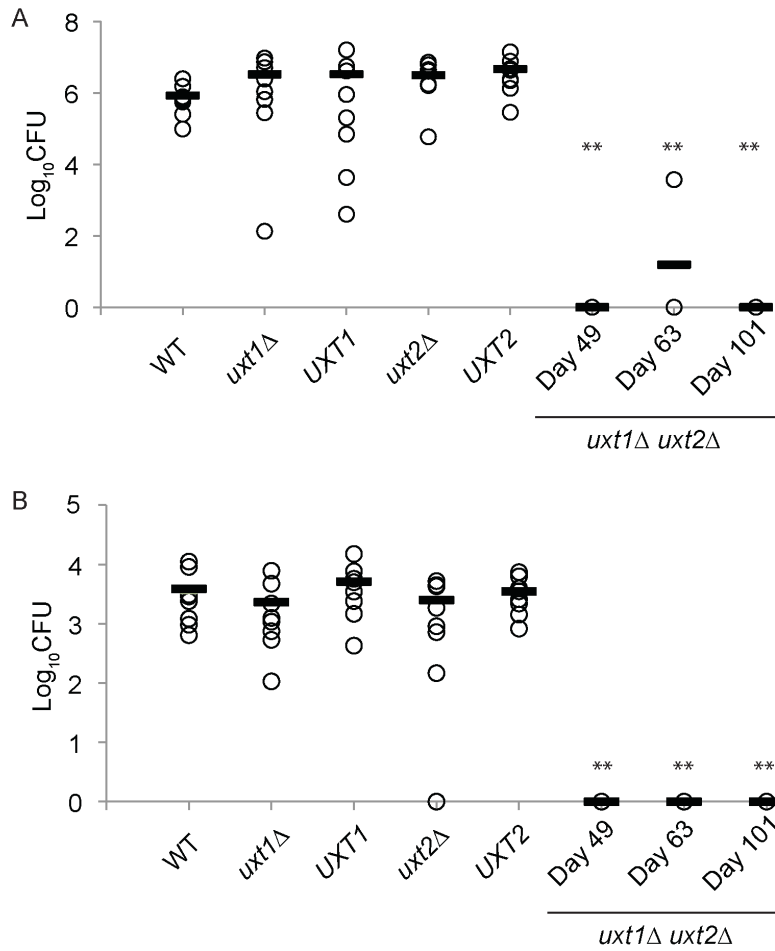

**S7 Figure. *uxt1Δ uxt2Δ* does not colonize extrapulmonary sites.**

Brain (A) and spleen (B) CFUs of infected A/JCr mice at the time of death (for WT, *uxt1Δ*, *uxt2Δ*, and complemented mutants; n = 8) or at the indicated time points (for *uxt1Δ uxt2Δ*; n = 3). Open circles, individual mice; black bar, mean; dashed line, initial inoculum. \*\*,  $p < 0.01$  by one-way ANOVA with Tukey's post hoc test.
