# Supplementary material for: Xylose donor transport is critical for fungal virulence
Source: PubMed Central journal article supplement (PMC5773217; doi:10.1371/journal.ppat.1006765), 2018-01-18
Supplement: ppat.1006765.s008.pdf [file ppat.1006765.s008.pdf]

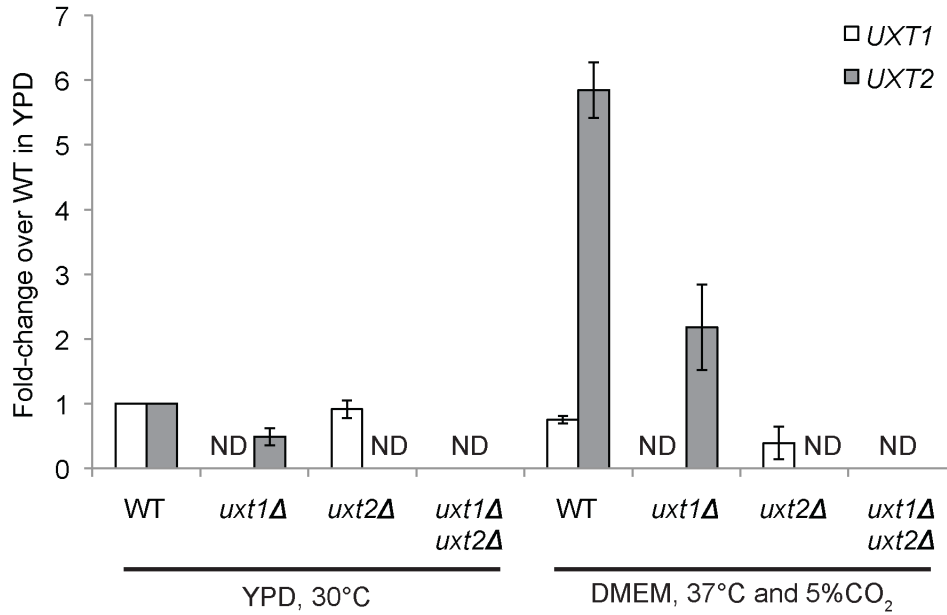

**S8 Figure. *UXT1* and *UXT2* transcription levels.**

Expression of *UXT1* and *UXT2* measured by qRT-PCR with RNA prepared from the indicated strains after growth in nutrient rich (YPD) or capsule-inducing conditions (DMEM, 37 °C and 5% CO<sub>2</sub>). Values are normalized to the WT sample grown in YPD and are the mean ± SEM of six biological replicates.
