# Supplementary material for: Xylose donor transport is critical for fungal virulence
Source: PubMed Central journal article supplement (PMC5773217; doi:10.1371/journal.ppat.1006765), 2018-01-18
Supplement: ppat.1006765.s010.pdf [file ppat.1006765.s010.pdf]

S1 Table. Methylation analysis of GXM for the indicated strains.<sup>a</sup>

|           | WT  | <i>uxt1</i> Δ | <i>UXT1</i> | <i>uxt2</i> Δ | <i>UXT2</i> | <i>uxt1</i> Δ <i>uxt2</i> Δ |
|-----------|-----|---------------|-------------|---------------|-------------|-----------------------------|
| t-Man     | 0.4 | 0.1           | 0.1         | 0.3           | 0.1         | 0.5                         |
| 3-Man     | 42  | 66            | 47          | 51            | 39          | 80 <sup>b</sup>             |
| 2,3-Man   | 53  | 33            | 48          | 45            | 54          | 18                          |
| 3,4-Man   | 0.8 | 0.4           | 0.6         | 0.8           | 1.4         | 0.8                         |
| 2,3,4-Man | 3.4 | 0.4           | 4.5         | 2.5           | 4.1         | 0.0                         |

<sup>a</sup> Values reported as percent of total mannose linkages to facilitate comparison.

<sup>b</sup> This product primarily reflects backbone substitution with GlcA.
