# Supplementary material for: Xylose donor transport is critical for fungal virulence
Source: PubMed Central journal article supplement (PMC5773217; doi:10.1371/journal.ppat.1006765), 2018-01-18
Supplement: ppat.1006765.s011.pdf [file ppat.1006765.s011.pdf]

S2 Table. Staining and stress sensitivity of *Cryptococcus neoformans* strains.

| Strain                      | Anti-GXM mAbs |     | Cell wall staining <sup>a</sup> |      |        |      | Cell growth <sup>b</sup> |        |          |           |                |
|-----------------------------|---------------|-----|---------------------------------|------|--------|------|--------------------------|--------|----------|-----------|----------------|
|                             | 2H1           | 3C2 | CFW                             | ConA | EosinY | Pont | YPD                      | 2% CFW | 0.05% CR | 0.01% SDS | 1.5 M Sorbitol |
| WT                          | +             | +   | +                               | +    | +      | +    | +                        | +      | +        | +         | +              |
| <i>uxt1</i> Δ               | +             | +   | +                               | +    | +      | +    | +                        | +      | +        | +         | +              |
| <i>UXT1</i>                 | +             | +   | +                               | +    | +      | +    | +                        | +      | +        | +         | +              |
| <i>uxt2</i> Δ               | +             | +   | +                               | +    | +      | +    | +                        | +      | +        | +         | +              |
| <i>UXT2</i>                 | +             | +   | +                               | +    | +      | +    | +                        | +      | +        | +         | +              |
| <i>uxt1</i> Δ <i>uxt2</i> Δ | -             | -   | +                               | +    | +      | +    | +                        | +      | +        | +         | +              |
| <i>uxs1</i> Δ               | -             | -   | NT <sup>c</sup>                 | NT   | NT     | NT   | +                        | +      | +        | +         | +              |

<sup>a</sup> The indicated strains were stained with CFW (binds chitin), ConA (binds mannoproteins), Eosin Y (binds chitosan), or Pont (binds unspecified cell wall components) as in Materials and Methods.

<sup>b</sup> All growth conditions were assayed at 30°C.

<sup>c</sup> NT, not tested
