# Supplementary material for: Xylose donor transport is critical for fungal virulence
Source: PubMed Central journal article supplement (PMC5773217; doi:10.1371/journal.ppat.1006765), 2018-01-18
Supplement: ppat.1006765.s012.pdf [file ppat.1006765.s012.pdf]

S3 Table. Nucleotide sugar contents of *Cryptococcus neoformans* strains.<sup>a</sup>

| Compound     | Wild type          | <i>uxt1</i> Δ | <i>UXT1</i> | <i>uxt2</i> Δ | <i>UXT2</i> | <i>uxt1</i> Δ<br><i>uxt2</i> Δ | <i>uxs1</i> Δ          |
|--------------|--------------------|---------------|-------------|---------------|-------------|--------------------------------|------------------------|
| UDP-α-D-Xyl  | 1 ± 0 <sup>b</sup> | 3 ± 1         | 2 ± 1       | 1 ± 0         | 1 ± 0       | 6 ± 3                          | ND <sup>c,d</sup>      |
| UDP-α-D-Glc  | 16 ± 2             | 55 ± 17       | 26 ± 7      | 23 ± 6        | 21 ± 6      | 46 ± 21                        | 50 ± 9                 |
| UDP-α-D-GlcA | 4 ± 1              | 4 ± 2         | 5 ± 1       | 6 ± 1         | 5 ± 2       | 0 ± 0                          | 400 ± 105 <sup>c</sup> |
| UDP-α-D-Galp | 1 ± 0              | 4 ± 3         | 2 ± 1       | 1 ± 1         | 1 ± 1       | 3 ± 3                          | 4 ± 3                  |

<sup>a</sup> Levels of UDP-α-D-Galf, UDP-α-D-Arap, and UDP-α-D-Araf were below the limit of detection.

<sup>b</sup> Values are given in pmol mg<sup>-1</sup> wet weight and represent the average of *n* = 4 (± SEM). Estimated cell volume was used to convert values to μM (see Materials and Methods for details).

<sup>c</sup> ANOVA, *p* ≤ 0.01.

<sup>d</sup> ND, below limit of detection.
