# Supplementary material for: Xylose donor transport is critical for fungal virulence
Source: PubMed Central journal article supplement (PMC5773217; doi:10.1371/journal.ppat.1006765), 2018-01-18
Supplement: ppat.1006765.s013.pdf [file ppat.1006765.s013.pdf]

S4 Table. Uxt1 and Uxt2 content of proteoliposomes used for transport assays.

|      | Molecular Mass (Da) | fmol <sup>a</sup> /5 $\mu$ g | ng/5 $\mu$ g                | Total protein (%)            |
|------|---------------------|------------------------------|-----------------------------|------------------------------|
| Uxt1 | 42442.2             | 501.8 $\pm$ 2.0 <sup>b</sup> | 21.3 $\pm$ 0.1 <sup>b</sup> | 0.43 $\pm$ 0.00 <sup>b</sup> |
| Uxt2 | 43535.4             | 116.2 $\pm$ 5.9 <sup>b</sup> | 5.1 $\pm$ 0.3 <sup>b</sup>  | 0.10 $\pm$ 0.01 <sup>b</sup> |

<sup>a</sup>Amount was estimated using LC-MS/MS (MRM) quantitation of a C-terminal peptide (SRGPFEGKPIPPLLGLDSTR), and interpreted based on the molecular mass (including V5-tag and 6-His tags) estimated using the Compute pI/Mw tool at ExPASy (<http://web.expasy.org/>).

<sup>b</sup>Values represent the mean  $\pm$  SD of n = 3.
